# Supplementary material
Source: Springer Nature journal article supplement (https://www.springermedizin.de/resource/supplementary/12911_2010_405_MOESM2_ESM.pdf/9525672)

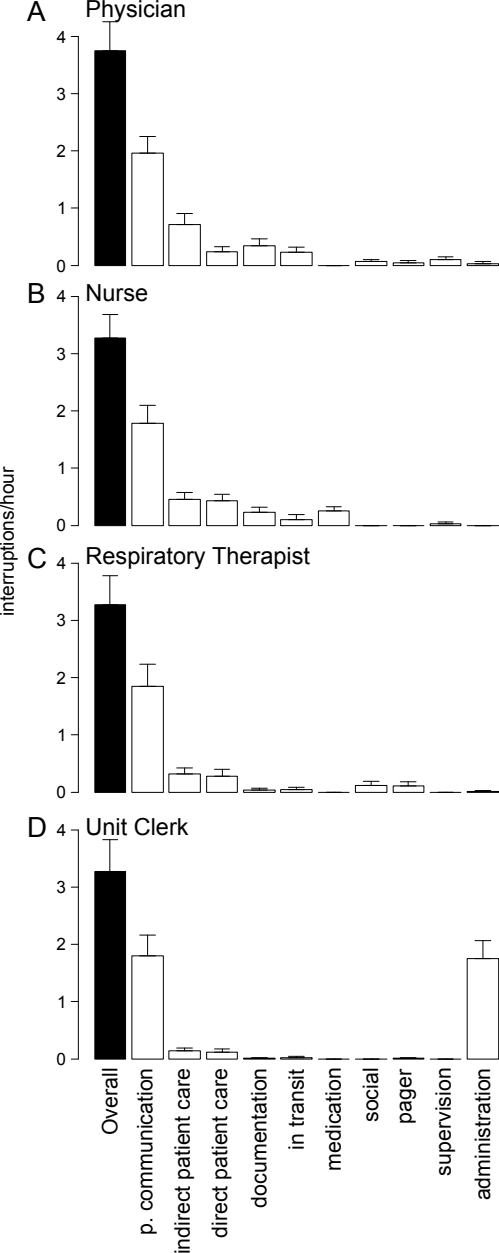

Supplement: MOESM2 [file 9525672]
